# Supplementary material for: Charge-induced structural transition between seashell-like B29− and B29+ in 18 π-electron configurations
Source: Royal Society of Chemistry journal article supplement (doi:10.1039/c8cp01078a), 2018-01-01
Supplement: c8cp01078a1.pdf [file c8cp01078a1.pdf]

## Electronic Supporting Information

### Charge-induced structural transition between seashell-like $B_{29}^-$ and $B_{29}^+$ in 18 $\pi$ -electron configurations

Ling Pei,<sup>a,b</sup> Hai-Ru Li,<sup>a</sup> Miao Yan,<sup>a</sup> Qiang Chen,<sup>a</sup> Yue-Wen Mu,<sup>a</sup> Hai-Gang Lu,<sup>a</sup> Yan-Bo Wu,<sup>a</sup> Si-Dian Li\*<sup>a</sup>

**Fig.S1** Low-lying isomers of  $B_{29}^+$  with their relative energies (with zero-point corrections included) indicated in eV at PBE0/6-311+G(d) and CCSD(T)/6-311G(d)//PBE0/6-311+G(d) (in parentheses) levels

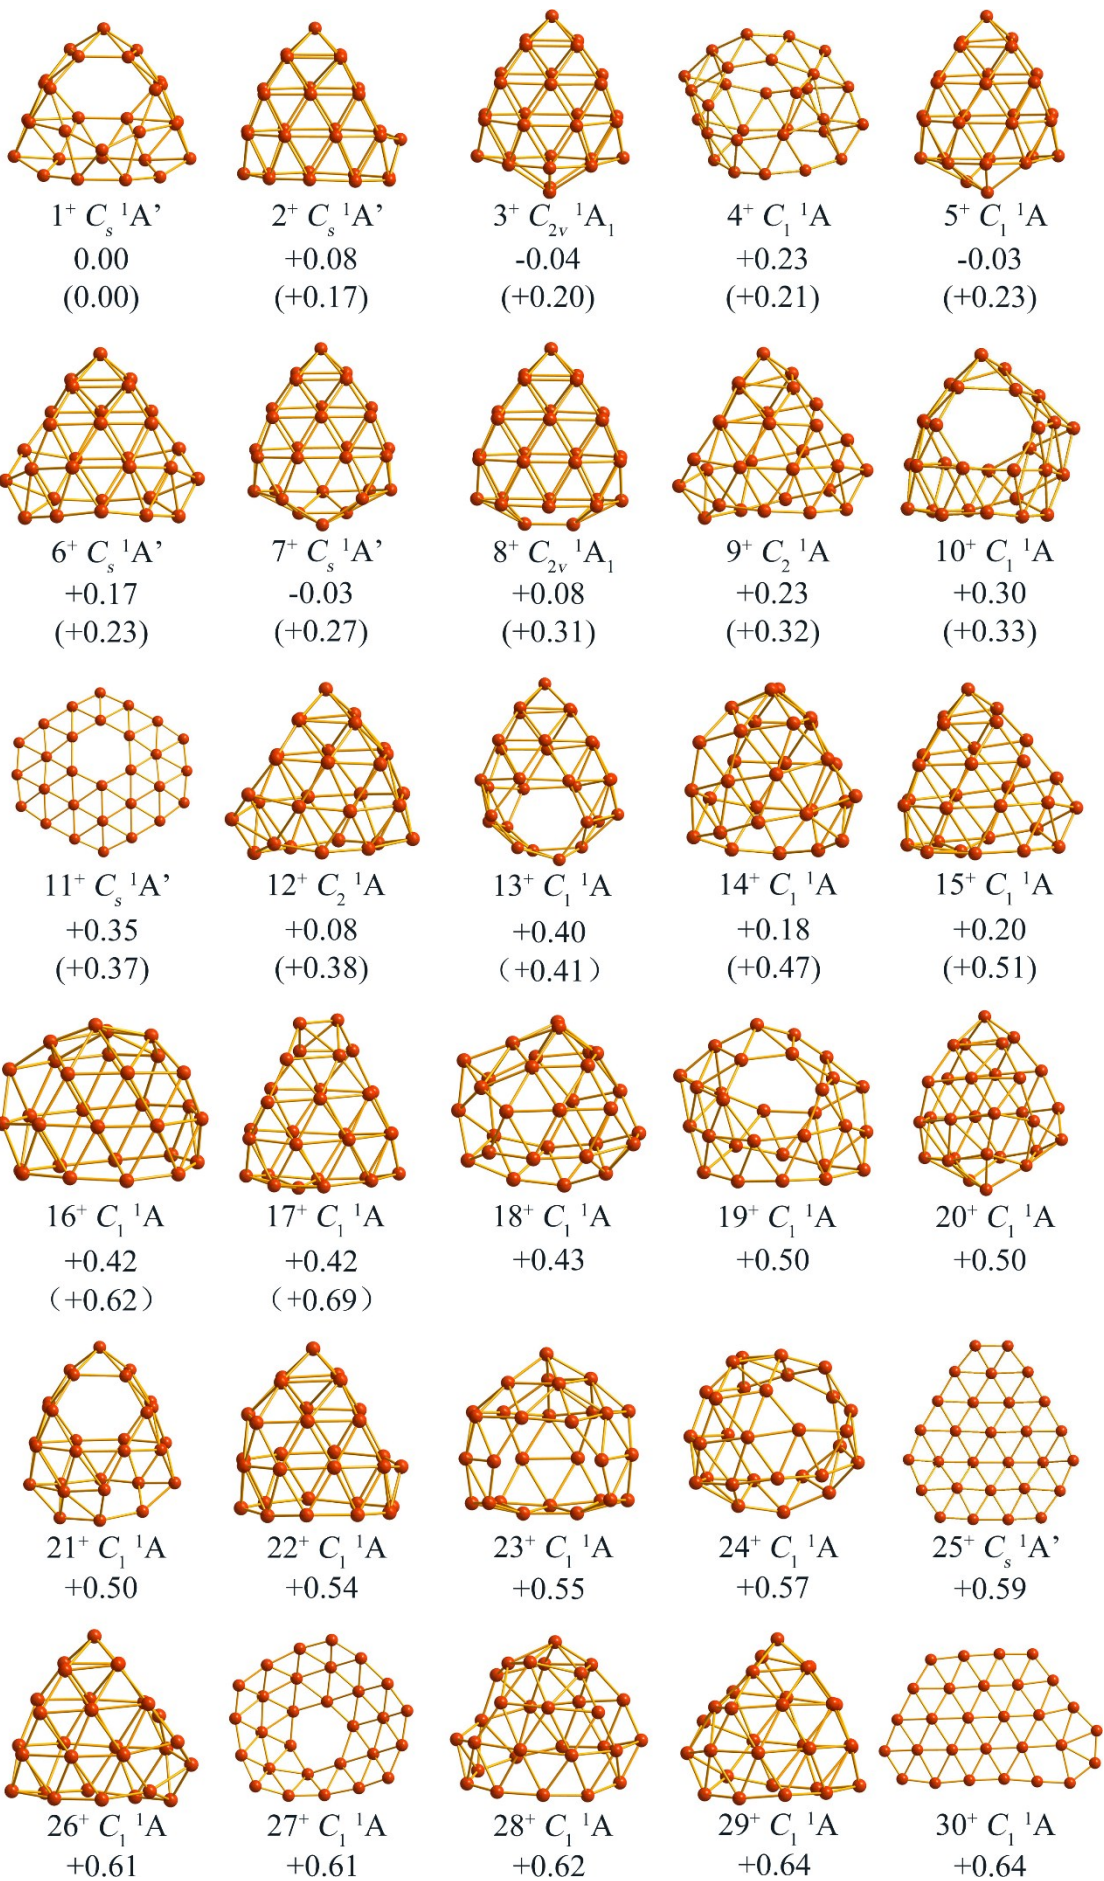

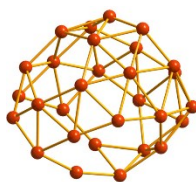

31<sup>+</sup> C<sub>1</sub><sup>1</sup>A  
+0.65

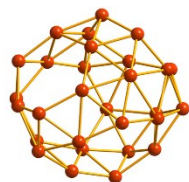

32<sup>+</sup> C<sub>1</sub><sup>1</sup>A  
+0.65

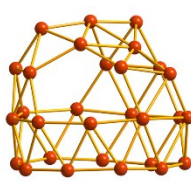

33<sup>+</sup> C<sub>1</sub><sup>1</sup>A  
+0.66

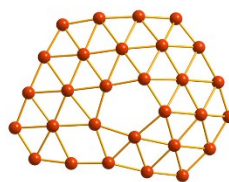

34<sup>+</sup> C<sub>1</sub><sup>1</sup>A  
+0.66

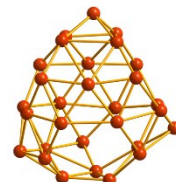

35<sup>+</sup> C<sub>1</sub><sup>1</sup>A  
+0.66

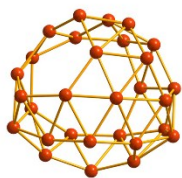

36<sup>+</sup> C<sub>1</sub><sup>1</sup>A  
+0.67

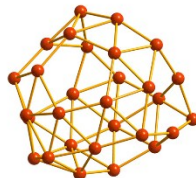

37<sup>+</sup> C<sub>1</sub><sup>1</sup>A  
+0.68

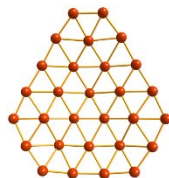

38<sup>+</sup> C<sub>s</sub><sup>1</sup>A'

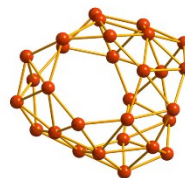

39<sup>+</sup> C<sub>1</sub><sup>1</sup>A  
+0.70

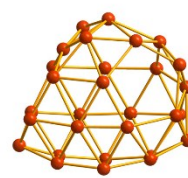

40<sup>+</sup> C<sub>1</sub><sup>1</sup>A  
+0.71

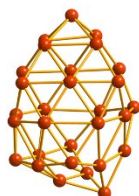

41<sup>+</sup> C<sub>1</sub><sup>1</sup>A  
+0.73

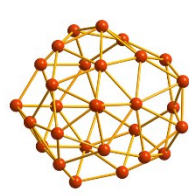

42<sup>+</sup> C<sub>1</sub><sup>1</sup>A  
+0.73

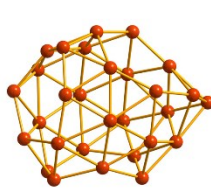

43<sup>+</sup> C<sub>1</sub><sup>1</sup>A  
+0.73

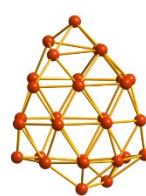

44<sup>+</sup> C<sub>1</sub><sup>1</sup>A  
+0.73

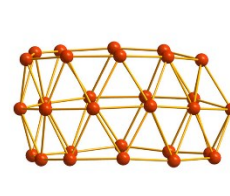

45<sup>+</sup> C<sub>1</sub><sup>1</sup>A  
+0.73  
(+0.89)

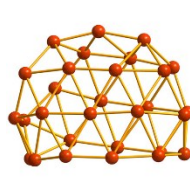

46<sup>+</sup> C<sub>1</sub><sup>1</sup>A  
+0.74

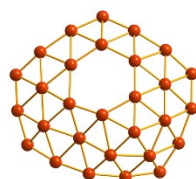

47<sup>+</sup> C<sub>1</sub><sup>1</sup>A  
+0.74

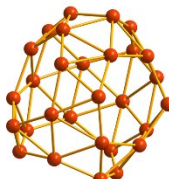

48<sup>+</sup> C<sub>1</sub><sup>1</sup>A  
+0.76

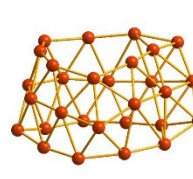

49<sup>+</sup> C<sub>1</sub><sup>1</sup>A  
+0.76

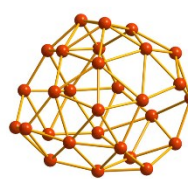

50<sup>+</sup> C<sub>1</sub><sup>1</sup>A  
+0.76

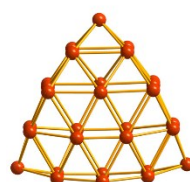

51<sup>+</sup> C<sub>2v</sub><sup>1</sup>A<sub>1</sub>  
+0.76

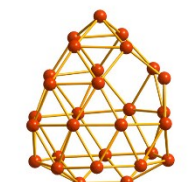

52<sup>+</sup> C<sub>1</sub><sup>1</sup>A  
+0.76

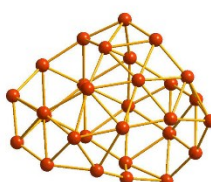

53<sup>+</sup> C<sub>1</sub><sup>1</sup>A  
+0.78

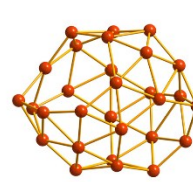

54<sup>+</sup> C<sub>1</sub><sup>1</sup>A  
+0.79

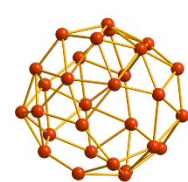

55<sup>+</sup> C<sub>1</sub><sup>1</sup>A  
+0.79

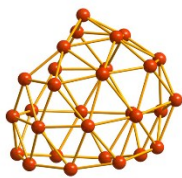

56<sup>+</sup> C<sub>1</sub><sup>1</sup>A  
+0.79

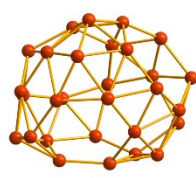

57<sup>+</sup> C<sub>1</sub><sup>1</sup>A  
+0.80

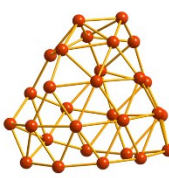

58<sup>+</sup> C<sub>1</sub><sup>1</sup>A  
+0.80

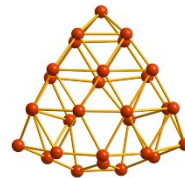

59<sup>+</sup> C<sub>1</sub><sup>1</sup>A  
+0.81

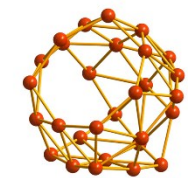

60<sup>+</sup> C<sub>1</sub><sup>1</sup>A  
+0.81

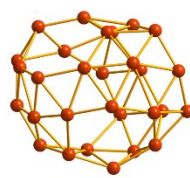

61<sup>+</sup> C<sub>1</sub><sup>1</sup>A  
+0.81

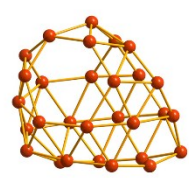

62<sup>+</sup> C<sub>1</sub><sup>1</sup>A  
+0.83

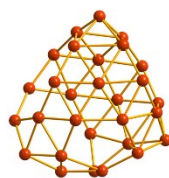

63<sup>+</sup> C<sub>1</sub><sup>1</sup>A  
+0.84

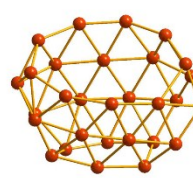

64<sup>+</sup> C<sub>1</sub><sup>1</sup>A  
+0.85

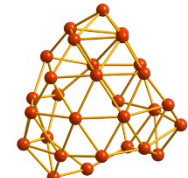

65<sup>+</sup> C<sub>1</sub><sup>1</sup>A  
+0.85

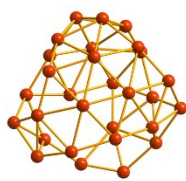

66<sup>+</sup> C<sub>1</sub> 1A  
+0.86

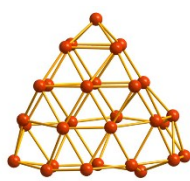

67<sup>+</sup> C<sub>1</sub> 1A  
+0.86

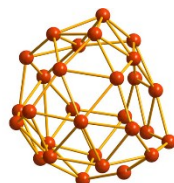

68<sup>+</sup> C<sub>1</sub> 1A  
+0.87

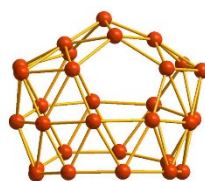

69<sup>+</sup> C<sub>1</sub> 1A  
+0.88

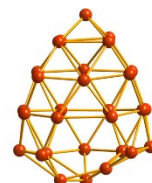

70<sup>+</sup> C<sub>1</sub> 1A  
+0.88

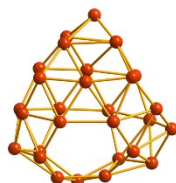

71<sup>+</sup> C<sub>1</sub> 1A  
+0.88

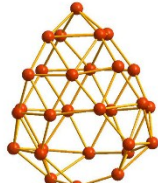

72<sup>+</sup> C<sub>1</sub> 1A  
+0.88

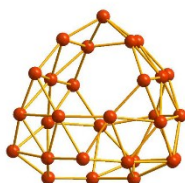

73<sup>+</sup> C<sub>1</sub> 1A  
+0.89

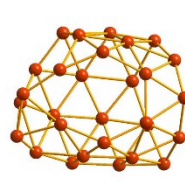

74<sup>+</sup> C<sub>1</sub> 1A  
+0.89

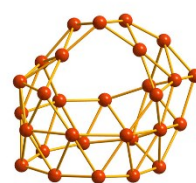

75<sup>+</sup> C<sub>1</sub> 1A  
+0.89

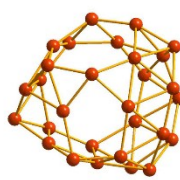

76<sup>+</sup> C<sub>1</sub> 1A  
+0.89

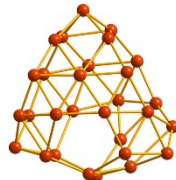

77<sup>+</sup> C<sub>1</sub> 1A  
+0.89

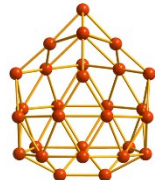

78<sup>+</sup> C<sub>s</sub> 1A'  
+0.90

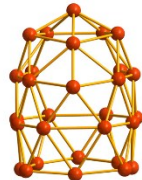

79<sup>+</sup> C<sub>s</sub> 1A'  
+0.90

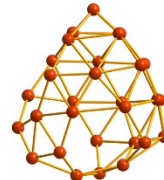

80<sup>+</sup> C<sub>1</sub> 1A  
+0.90

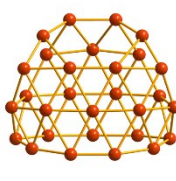

81<sup>+</sup> C<sub>s</sub> 1A'  
+0.90

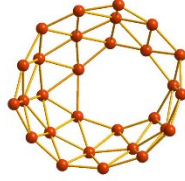

82<sup>+</sup> C<sub>1</sub> 1A  
+0.90

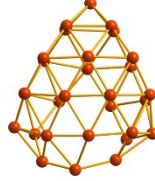

83<sup>+</sup> C<sub>1</sub> 1A  
+0.91

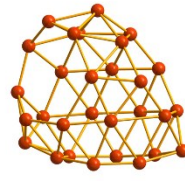

84<sup>+</sup> C<sub>1</sub> 1A  
+0.91

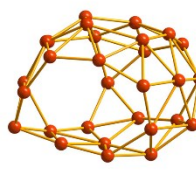

85<sup>+</sup> C<sub>1</sub> 1A  
+0.91

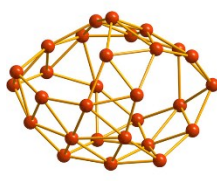

86<sup>+</sup> C<sub>1</sub> 1A  
+0.91

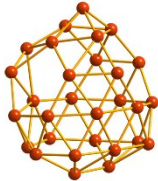

87<sup>+</sup> C<sub>1</sub> 1A  
+0.91

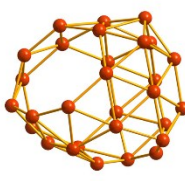

88<sup>+</sup> C<sub>1</sub> 1A  
+0.92

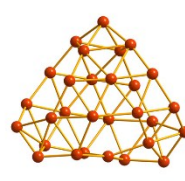

89<sup>+</sup> C<sub>1</sub> 1A  
+0.92

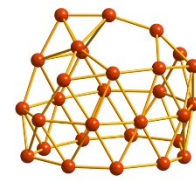

90<sup>+</sup> C<sub>1</sub> 1A  
+0.92

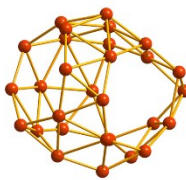

91<sup>+</sup> C<sub>1</sub> 1A  
+0.92

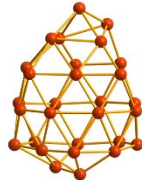

92<sup>+</sup> C<sub>1</sub> 1A  
+0.93

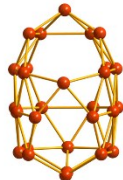

93<sup>+</sup> C<sub>s</sub> 1A'  
+0.93

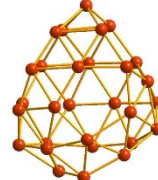

94<sup>+</sup> C<sub>1</sub> 1A  
+0.93

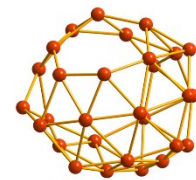

95<sup>+</sup> C<sub>1</sub> 1A  
+0.94

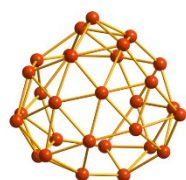

96<sup>+</sup> C<sub>1</sub> 1A  
+0.94

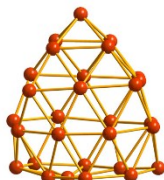

97<sup>+</sup> C<sub>1</sub> 1A  
+0.94

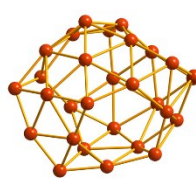

98<sup>+</sup> C<sub>1</sub> 1A  
+0.95

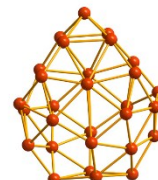

99<sup>+</sup> C<sub>2</sub> 1A  
+0.96

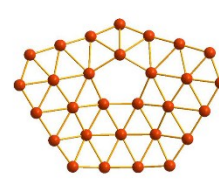

100<sup>+</sup> C<sub>s</sub> 1A'  
+1.62

**Fig.S2** Born-Oppenheimer molecular dynamics simulations of  $C_s B_{29}^+$  ( $1^+$ ) at 500K, 700K and 1000K for 30 ps. The root-mean-square-deviation (RMSD) and maximum bond length deviation (MAXD) values (on average) are indicated in Å.

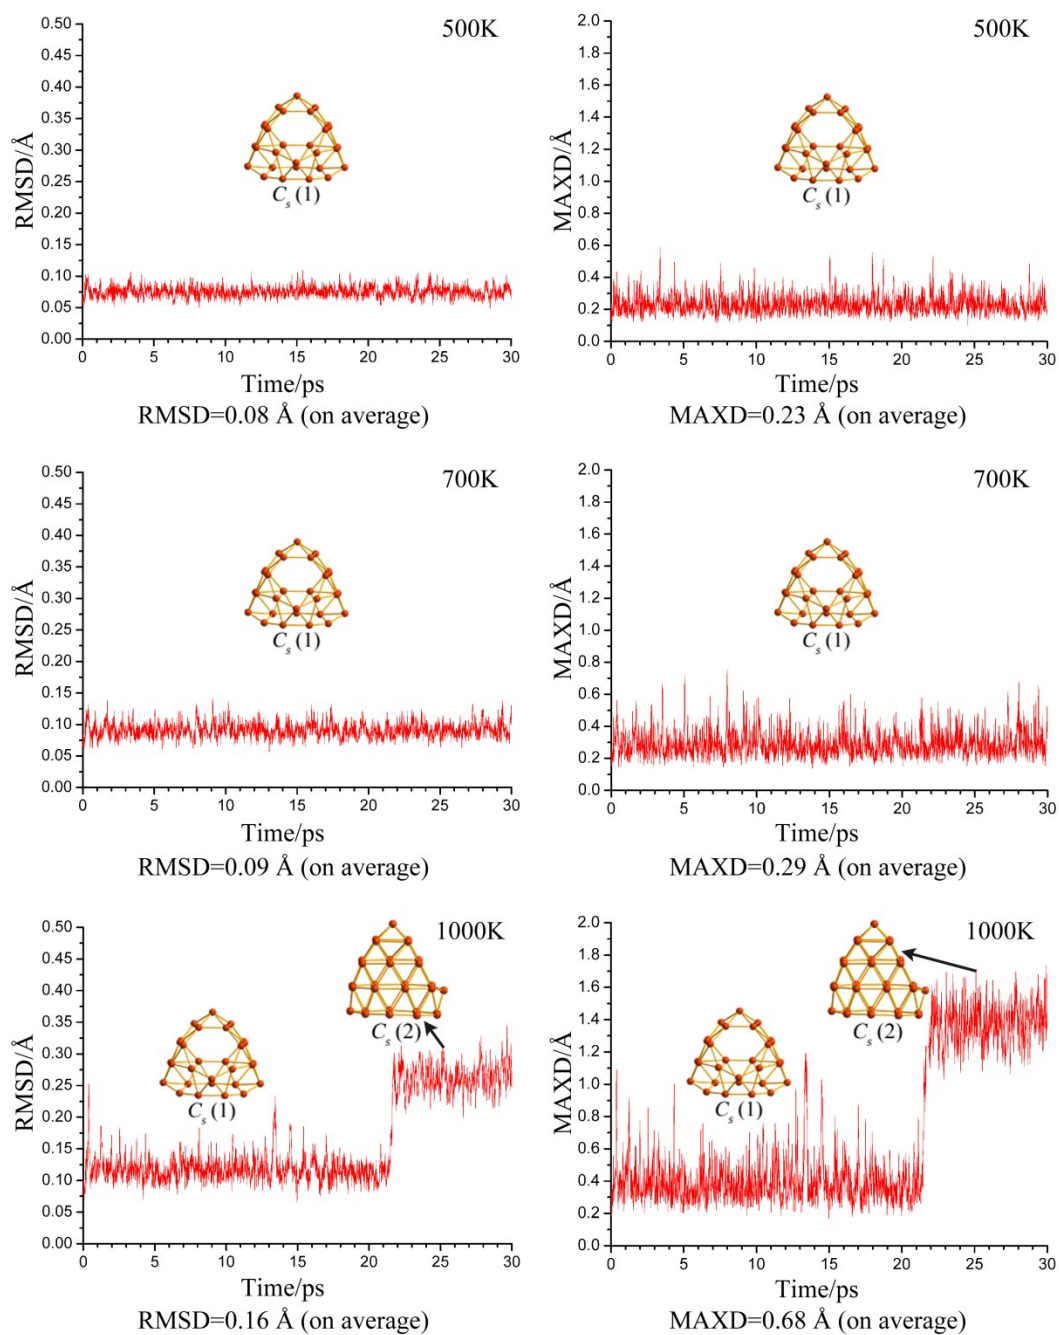

**Table S1** optimized coordinates (Å) of the five lowest-lying isomers of  $B_{29}^+$  at PBE0/6-311+G(d)

1.  $C_s B_{29}^+ (1^+)$

|   |             |             |             |
|---|-------------|-------------|-------------|
| B | 2.57394800  | 0.11795900  | 1.16305200  |
| B | -0.50464600 | 0.51087100  | -2.55568600 |
| B | -2.12182700 | -0.40408100 | -2.03616500 |
| B | -1.29637700 | 1.46584000  | -1.30088400 |
| B | -0.89589400 | -1.55360300 | 1.50798300  |
| B | 0.22199000  | 1.74581800  | -1.84233700 |
| B | 1.08660500  | 0.38841900  | -2.04522800 |
| B | 1.93557800  | -1.07049200 | -1.98835600 |
| B | -0.62643400 | -1.95789800 | 0.00000000  |
| B | 1.08660500  | 0.38841900  | 2.04522800  |
| B | -1.10276400 | -0.97690300 | -3.07784000 |
| B | -2.12182700 | -0.40408100 | 2.03616500  |
| B | -1.29637700 | 1.46584000  | 1.30088400  |
| B | 0.76159200  | -1.63033900 | -0.85391900 |
| B | 0.44167300  | -1.19649200 | 2.61788700  |
| B | -1.10276400 | -0.97690300 | 3.07784000  |
| B | 0.76159200  | -1.63033900 | 0.85391900  |
| B | -0.50464600 | 0.51087100  | 2.55568600  |
| B | 2.87334700  | 1.18161700  | 0.00000000  |
| B | -0.89589400 | -1.55360300 | -1.50798300 |
| B | 0.22199000  | 1.74581800  | 1.84233700  |
| B | 1.93557800  | -1.07049200 | 1.98835600  |
| B | 1.56609600  | 1.60801500  | -0.87405000 |
| B | 1.56609600  | 1.60801500  | 0.87405000  |
| B | 0.44167300  | -1.19649200 | -2.61788700 |
| B | -2.70294300 | 0.49664200  | -0.83939400 |
| B | 2.57394800  | 0.11795900  | -1.16305200 |
| B | -2.70294300 | 0.49664200  | 0.83939400  |
| B | -2.17297400 | 1.77297300  | 0.00000000  |

2.  $C_s B_{29}^+ (2^+)$

|   |             |             |             |
|---|-------------|-------------|-------------|
| B | 0.14886000  | 0.65823400  | 2.21435100  |
| B | -2.45332100 | -0.15150600 | 1.35563400  |
| B | 2.48160800  | -2.17090300 | 0.00000000  |
| B | -0.62633000 | 2.15998100  | 1.90139500  |
| B | -0.62633000 | 2.15998100  | -1.90139500 |
| B | -1.56820600 | 0.90388200  | 2.18705600  |
| B | -2.45332100 | -0.15150600 | -1.35563400 |
| B | 2.28384000  | -0.87804500 | -0.93020500 |
| B | 0.09664500  | 3.07891300  | 0.82660500  |
| B | -0.31685700 | -2.13644500 | -1.56395600 |

|   |             |             |             |
|---|-------------|-------------|-------------|
| B | -0.31685700 | -2.13644500 | 1.56395600  |
| B | -1.76042200 | -1.66820900 | -0.85686500 |
| B | 0.14886000  | 0.65823400  | -2.21435100 |
| B | 1.75128000  | 0.36583000  | 1.77207300  |
| B | 0.70838900  | -0.92498700 | -1.95486600 |
| B | 1.09551900  | 1.85535900  | -1.47007300 |
| B | 1.38530600  | 2.51783300  | 0.00000000  |
| B | 0.09664500  | 3.07891300  | -0.82660500 |
| B | -1.56820600 | 0.90388200  | -2.18705600 |
| B | 1.13850300  | -2.30793000 | -0.88303300 |
| B | 1.75128000  | 0.36583000  | -1.77207300 |
| B | 2.28384000  | -0.87804500 | 0.93020500  |
| B | 0.70838900  | -0.92498700 | 1.95486600  |
| B | -2.93537900 | -0.87886800 | 0.00000000  |
| B | 1.09551900  | 1.85535900  | 1.47007300  |
| B | -1.76042200 | -1.66820900 | 0.85686500  |
| B | 1.13850300  | -2.30793000 | 0.88303300  |
| B | -0.96366700 | -0.68910900 | -2.03355300 |
| B | -0.96366700 | -0.68910900 | 2.03355300  |

### 3. $C_{2v} B_{29}^+ (3^+)$

|   |             |             |             |
|---|-------------|-------------|-------------|
| B | -0.90396300 | 2.04428600  | -0.23154700 |
| B | -0.87629600 | 0.99290400  | 2.39803500  |
| B | 2.25091200  | 0.92248800  | -0.17142500 |
| B | -2.25091200 | 0.92248800  | -0.17142500 |
| B | -0.90396300 | -2.04428600 | -0.23154700 |
| B | -1.71956100 | 1.65916800  | 1.17409800  |
| B | 0.00000000  | 0.00000000  | 3.32235400  |
| B | 1.40986100  | -1.21160800 | -1.67504400 |
| B | -1.40986100 | 1.21160800  | -1.67504400 |
| B | 2.25091200  | -0.92248800 | -0.17142500 |
| B | 0.00000000  | 1.80874800  | 1.15857500  |
| B | 1.71956100  | -1.65916800 | 1.17409800  |
| B | 0.00000000  | -1.80874800 | 1.15857500  |
| B | 0.00000000  | 2.09184400  | -1.68161200 |
| B | 0.90396300  | -2.04428600 | -0.23154700 |
| B | -1.40986100 | -1.21160800 | -1.67504400 |
| B | -2.25091200 | -0.92248800 | -0.17142500 |
| B | -2.49612800 | 0.00000000  | -1.49628500 |
| B | -1.71956100 | -1.65916800 | 1.17409800  |
| B | 2.49612800  | 0.00000000  | -1.49628500 |
| B | 0.00000000  | -0.81641600 | -2.63009100 |
| B | 1.40986100  | 1.21160800  | -1.67504400 |
| B | 0.90396300  | 2.04428600  | -0.23154700 |

|   |             |             |             |
|---|-------------|-------------|-------------|
| B | -0.87629600 | -0.99290400 | 2.39803500  |
| B | 0.00000000  | -2.09184400 | -1.68161200 |
| B | 0.87629600  | 0.99290400  | 2.39803500  |
| B | 0.00000000  | 0.81641600  | -2.63009100 |
| B | 0.87629600  | -0.99290400 | 2.39803500  |
| B | 1.71956100  | 1.65916800  | 1.17409800  |

4.  $C_1 B_{29}^+ (4^+)$

|   |             |             |             |
|---|-------------|-------------|-------------|
| B | -0.79519000 | 2.57702300  | 0.45374100  |
| B | 2.22421800  | 0.45947000  | -0.79054700 |
| B | 1.74056800  | -2.53785700 | 0.09672300  |
| B | 0.41595800  | -2.58385800 | -0.75689400 |
| B | -1.79342100 | -1.14277300 | 1.38373200  |
| B | 1.16319000  | 0.01661300  | -1.94524500 |
| B | 3.01166000  | 1.43120800  | 0.49720900  |
| B | 2.14510900  | 0.14537000  | 1.33594800  |
| B | -0.30498800 | -1.22285400 | 1.90834000  |
| B | -1.98523000 | 1.40986800  | -0.09829300 |
| B | 2.79321300  | -1.39747700 | 0.45383600  |
| B | -2.33767200 | -1.75340600 | -0.31912200 |
| B | -1.53211900 | -0.69341400 | -1.59865500 |
| B | 0.70791900  | 0.01590800  | 2.03015300  |
| B | -2.54887800 | 0.43160400  | 1.27232900  |
| B | -3.26796000 | -0.95844700 | 0.66699200  |
| B | -0.88636700 | 0.39134400  | 1.80883400  |
| B | -2.80881400 | 0.02838000  | -0.59784900 |
| B | 0.43390000  | 2.86446500  | -0.58491300 |
| B | 1.22157600  | -1.40841900 | 1.25912200  |
| B | -1.98706100 | 0.90366600  | -1.64474800 |
| B | -1.71215800 | 1.83138300  | 1.51196800  |
| B | 0.92158900  | 1.53188300  | -1.41001600 |
| B | -0.74901800 | 1.94090800  | -1.22719300 |
| B | 3.57285800  | 0.01180600  | 0.36452500  |
| B | 0.03635100  | -1.18342800 | -1.78462600 |
| B | 1.83654500  | 2.31473500  | -0.12028000 |
| B | -1.08966300 | -2.24095800 | -1.23431000 |
| B | 1.57388300  | -1.18274300 | -0.93076100 |

5.  $C_1 B_{29}^+ (5^+)$

|   |             |             |             |
|---|-------------|-------------|-------------|
| B | -0.37138600 | 1.89579600  | -1.23390500 |
| B | 2.32116100  | 1.21416200  | -0.62229200 |
| B | 0.84726800  | -0.60769400 | -2.39791500 |
| B | -0.12766600 | 2.41263700  | 0.43740800  |
| B | 0.06166600  | -0.24937500 | 2.12506000  |



|   |             |             |             |
|---|-------------|-------------|-------------|
| B | 1.13182400  | 2.31172300  | -0.65971500 |
| B | 3.33978100  | -0.05066000 | -0.42520600 |
| B | -1.66302800 | -2.11647600 | 0.73797300  |
| B | -1.86097000 | 1.20892600  | -1.63615500 |
| B | -0.27544700 | -2.43684300 | -0.31337400 |
| B | 0.94114500  | 0.89718900  | -1.58237000 |
| B | 1.17077800  | -2.30124300 | 0.34419900  |
| B | 1.39637900  | -1.00373400 | 1.45324700  |
| B | -1.68104100 | 1.82588000  | -0.04804900 |
| B | -0.10456700 | -1.76638300 | 1.31198500  |
| B | -1.53785800 | -0.92679400 | 1.82932000  |
| B | 0.14979900  | 1.44639800  | 1.96157500  |
| B | -1.29707800 | 2.14275900  | 1.51324500  |
| B | 1.52945400  | 0.60628200  | 2.06508500  |
| B | -1.76213400 | -1.99248200 | -0.91173500 |
| B | -2.44207300 | -0.75551600 | 0.25335500  |
| B | -0.48147000 | -1.39244100 | -1.77026400 |
| B | -0.49713700 | 0.29555700  | -2.15793900 |
| B | 2.67576300  | 0.13793900  | 1.01627000  |
| B | -1.36243000 | 0.66180500  | 2.15076100  |
| B | 2.19647600  | -0.32785900 | -1.54072100 |
| B | -2.80211100 | 0.61954300  | -0.48314400 |
| B | 2.41419700  | -1.28334100 | 0.06154000  |
| B | -1.90929700 | -0.46575600 | -1.47824100 |
